# Supplementary material for: Improved performance in micron-sized silicon anodes by in situ polymerization of acrylic acid-based slurry
Source: Royal Society of Chemistry journal article supplement (doi:10.1039/c6ta05650d), 2016-01-01

## Supplementary Information

Improved performance in micron-sized silicon anodes  
by *in-situ* polymerization of its acrylic acid-based slurry  
Chao Li,<sup>a,b</sup> Tongfei Shi,<sup>c</sup> Hideya Yoshitake,<sup>d</sup> and Hongyu Wang<sup>\*a</sup>

*<sup>a</sup>State Key Laboratory of Electroanalytical Chemistry, Changchun Institute of Applied Chemistry, Chinese Academy of Sciences, 5625 Renmin Street, Changchun 130022, China*

*<sup>b</sup>University of Chinese Academy of Sciences, Beijing 100049, China*

*<sup>c</sup>State Key Laboratory of Polymer Physics and Chemistry, Changchun Institute of Applied Chemistry, Chinese Academy of Sciences*

*<sup>d</sup>Faculty of Engineering, Yamagata University, Jyonan 4-3-16, Yonezawa 992-8510, Japan*

\* Corresponding author. Tel/Fax: 86-431-85262287. Email address: [hongyuwang@ciac.ac.cn](mailto:hongyuwang@ciac.ac.cn) (H. Wang)

**Fig. S1**

Reaction process: the acrylic acid monomer of solution can be polymerized at 72 °C, and the C=C double bond in acrylic acid is broken. At the same time, the long chain is connected with other monomers. The dissolved-alginate in water plays the function as a thickener and increase the viscosity of solution. While the acrylic acid is added in the solution, it can form weak interaction with alginate and Si-O on the silicon surface owing to the electrostatic force. After polymerization, the long chain of poly(acrylic acid) realize the function of adhesive each others.

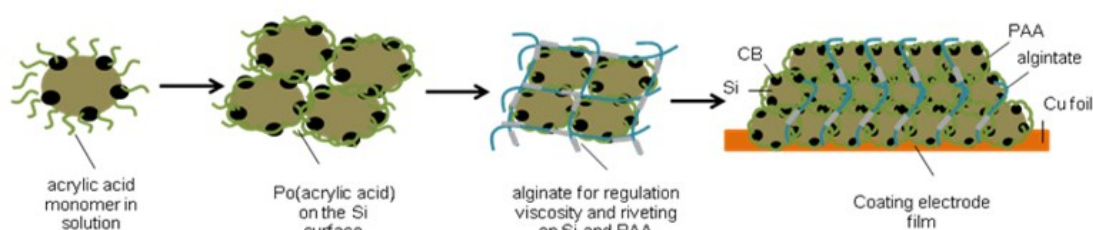

**Fig. S2**

SEM images of two kinds of Si electrodes, including the PA-Si electrodes of traditional mechanically-mixed slurry (a) and the cPA-Si electrodes obtained from slurry copolymerization method (b).

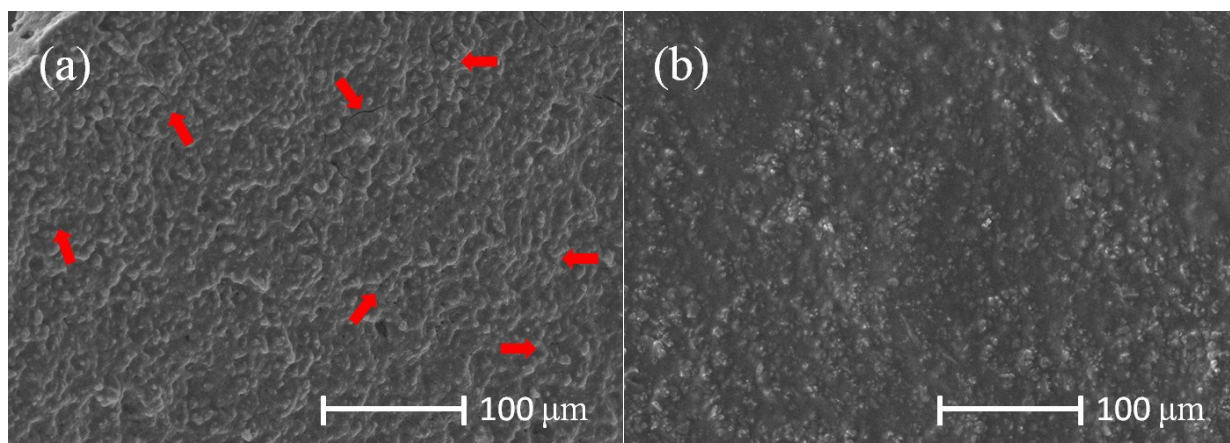

**Fig. S3**

AFM images of cPA-Si and PA-Si electrodes at a lithiation state, containing (a) 2D and (c) 3D images of PA-Si, (b) 2D and (d) 3D images of cPA-Si electrodes.

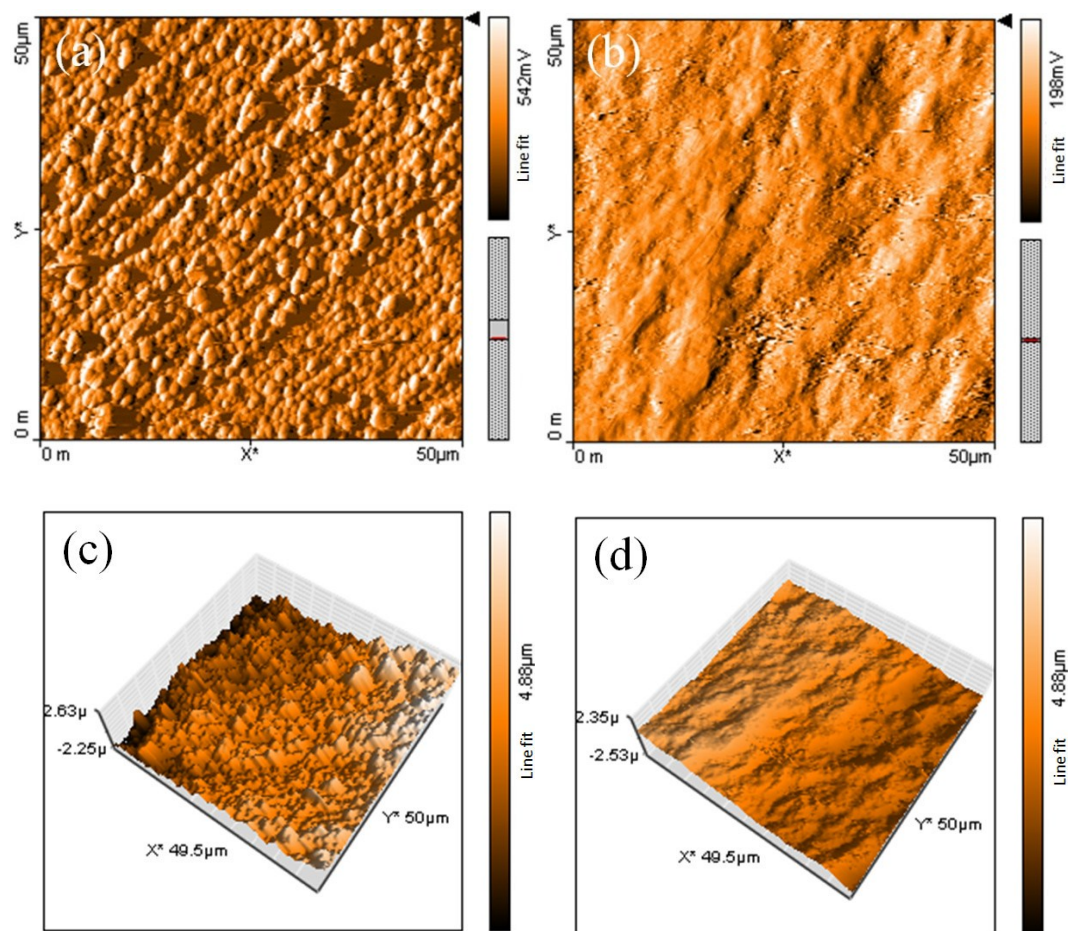

Supplement: c6ta05650d1.pdf [file c6ta05650d1.pdf]
